# Supplementary material for: Rehabilitation for people with dementia: a multi-method study examining knowledge and attitudes
Source: Springer Nature journal article supplement (doi:10.1186/s12877-020-01940-x), 2020-12-01
Supplement: MOESM1 [file 18670248]

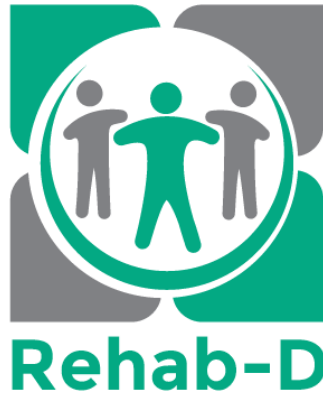

**Thank you for deciding to participate!**

All you need to do is:

1. Fill in the questionnaire on the next pages
2. Put the questionnaire into the enclosed envelope and put it into a post box. You do not need to put a stamp on it.

You can ask a family member or friend to help you fill out this questionnaire. Please make sure the responses reflect **your thoughts**.

Start the questionnaire on the next page.

## Your day-to-day difficulties

First, what are the main things that have caused you difficulty lately? Your family member or friend might be able to help you with this.

**Please choose all that apply by placing a tick in the box :**

- 1. Forgetting things, like people's names and appointment times
- 2. Having trouble finding the right words
- 3. Feeling down or blue
- 4. Confusion about what day or time it is
- 5. Finding it difficult to read
- 6. Having trouble handling cash (e.g. figuring out how many coins to give)
- 7. Falling over or worrying that you might fall over
- 8. Having trouble driving or not being able to drive anymore
- 9. Eating too much or not eating enough
- 10. Getting angry or upset more easily
- 11. Aches and pains
- 12. Putting something down and then forgetting where you've put it
- 13. Wanting to work or volunteer but not being able to
- 14. Feeling lonely
- 15. Something else (please write below):

---

---

---

---

---

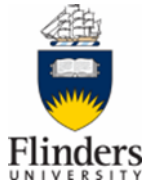

# Multidisciplinary Rehabilitation in Dementia: the Rehab-D Study

HREC Approval Number: HREC/16/SAC/434

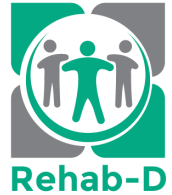

## Rehabilitation

Next, we want to learn about your understanding of the word 'rehabilitation'.

Have you ever heard of 'rehabilitation' before?

- No
- Yes
- I'm not sure

Have you ever received rehabilitation care before?

- No
- Yes
- I'm not sure

If yes, when and for what condition?

---

---

---

Please give us a brief explanation about what you think rehabilitation care is. If you're not sure, just write "I don't know".

---

---

---

---

---

## Your experiences

Now we would like to ask a few questions about your experiences with community / aged care services. Circle the number that describes how strongly you agree or disagree with the following statements.

|                                                                                                  |          |           |       |                |              |
|--------------------------------------------------------------------------------------------------|----------|-----------|-------|----------------|--------------|
| <b>1. I have access to the help and support I need to do the things that are important to me</b> |          |           |       |                |              |
| Strongly disagree                                                                                | Disagree | Undecided | Agree | Strongly agree | I don't know |
| <b>2. My doctor has put me in contact with other services to help me</b>                         |          |           |       |                |              |
| Strongly disagree                                                                                | Disagree | Undecided | Agree | Strongly agree | I don't know |
| <b>3. I know who to call if I want to access a service</b>                                       |          |           |       |                |              |
| Strongly disagree                                                                                | Disagree | Undecided | Agree | Strongly agree | I don't know |
| <b>4. I understand how the aged / community care system works</b>                                |          |           |       |                |              |
| Strongly disagree                                                                                | Disagree | Undecided | Agree | Strongly agree | I don't know |
| <b>5. I need more help to keep doing the things I like to do</b>                                 |          |           |       |                |              |
| Strongly disagree                                                                                | Disagree | Undecided | Agree | Strongly agree | I don't know |

## Your opinion of service ideas

Next, we are going to list some different services that you we think might be useful. We want to know your opinion of these ideas.

**Please tell us how likely you would be to use each service AT THE MOMENT if it was free and available in your area by circling your response.** If you're not sure, circle 'I don't know'.

|                                                                                     |                       |           |                    |                      |              |                    |
|-------------------------------------------------------------------------------------|-----------------------|-----------|--------------------|----------------------|--------------|--------------------|
| <b>1. A case manager or care coordinator to help you choose and access services</b> |                       |           |                    |                      |              |                    |
| Definitely would not use                                                            | Probably wouldn't use | Undecided | Probably would use | Definitely would use | I don't know | I already use this |
| <b>2. Group exercise classes at a gym, park, dance studio or clinic</b>             |                       |           |                    |                      |              |                    |
| Definitely would not use                                                            | Probably wouldn't use | Undecided | Probably would use | Definitely would use | I don't know | I already use this |
| <b>3. Counselling or therapy at a local clinic</b>                                  |                       |           |                    |                      |              |                    |
| Definitely would not use                                                            | Probably wouldn't use | Undecided | Probably would use | Definitely would use | I don't know | I already use this |

**Please tell us how likely you would be to use each service AT THE MOMENT if it was free and available in your area by circling your response.** If you're not sure, circle 'I don't know'.

|                                                                              |                       |           |                    |                      |              |                    |
|------------------------------------------------------------------------------|-----------------------|-----------|--------------------|----------------------|--------------|--------------------|
| <b>4. In-home mobility aids like rails, walking frames or chairs</b>         |                       |           |                    |                      |              |                    |
| Definitely would not use                                                     | Probably wouldn't use | Undecided | Probably would use | Definitely would use | I don't know | I already use this |
| <b>5. At-home exercise program written by a physiotherapist</b>              |                       |           |                    |                      |              |                    |
| Definitely would not use                                                     | Probably wouldn't use | Undecided | Probably would use | Definitely would use | I don't know | I already use this |
| <b>6. Strategies to managing memory loss or other thinking difficulties</b>  |                       |           |                    |                      |              |                    |
| Definitely would not use                                                     | Probably wouldn't use | Undecided | Probably would use | Definitely would use | I don't know | I already use this |
| <b>7. Help to find and attend social groups or activities that you enjoy</b> |                       |           |                    |                      |              |                    |
| Definitely would not use                                                     | Probably wouldn't use | Undecided | Probably would use | Definitely would use | I don't know | I already use this |
| <b>8. A meal delivery service</b>                                            |                       |           |                    |                      |              |                    |
| Definitely would not use                                                     | Probably wouldn't use | Undecided | Probably would use | Definitely would use | I don't know | I already use this |

**Please tell us how likely you would be to use each service AT THE MOMENT if it was free and available in your area, by circling your response.** If you're not sure, circle 'I don't know'.

|                                                                                         |                       |           |                    |                      |              |                    |
|-----------------------------------------------------------------------------------------|-----------------------|-----------|--------------------|----------------------|--------------|--------------------|
| <b>9. Assessment and advice to help with word finding or other language changes</b>     |                       |           |                    |                      |              |                    |
| Definitely would not use                                                                | Probably wouldn't use | Undecided | Probably would use | Definitely would use | I don't know | I already use this |
| <b>10. One-on-one exercise classes with a trainer, at a gym, park or clinic</b>         |                       |           |                    |                      |              |                    |
| Definitely would not use                                                                | Probably wouldn't use | Undecided | Probably would use | Definitely would use | I don't know | I already use this |
| <b>11. Help at home (e.g. with cleaning, home maintenance)</b>                          |                       |           |                    |                      |              |                    |
| Definitely would not use                                                                | Probably wouldn't use | Undecided | Probably would use | Definitely would use | I don't know | I already use this |
| <b>12. Support groups with other people with memory loss and other thinking changes</b> |                       |           |                    |                      |              |                    |
| Definitely would not use                                                                | Probably wouldn't use | Undecided | Probably would use | Definitely would use | I don't know | I already use this |

**Please tell us how likely you would be to use each service AT THE MOMENT if it was free and available in your area, by circling your response.** If you're not sure, circle 'I don't know'.

|                                                                                             |                       |           |                    |                      |              |                    |
|---------------------------------------------------------------------------------------------|-----------------------|-----------|--------------------|----------------------|--------------|--------------------|
| <b>13. Support to access work or volunteering opportunities</b>                             |                       |           |                    |                      |              |                    |
| Definitely would not use                                                                    | Probably wouldn't use | Undecided | Probably would use | Definitely would use | I don't know | I already use this |
| <b>14. Assistance with transport</b>                                                        |                       |           |                    |                      |              |                    |
| Definitely would not use                                                                    | Probably wouldn't use | Undecided | Probably would use | Definitely would use | I don't know | I already use this |
| <b>15. Someone to contact you regularly and help you access more support if you need it</b> |                       |           |                    |                      |              |                    |
| Definitely would not use                                                                    | Probably wouldn't use | Undecided | Probably would use | Definitely would use | I don't know | I already use this |



## About you

Lastly, we want to know a bit about you.

1. How old are you?

\_\_\_\_\_ years

2. What is your gender?

- Male
- Female
- Other

3. Were you born in Australia?

- Yes
- No, I was born in \_\_\_\_\_

4. Is English your first language?

- Yes
- No, my first language is \_\_\_\_\_

5. Do you identify as Aboriginal or Torres Strait Islander?

- No
- Yes, Aboriginal
- Yes, Torres Strait Islander
- Yes, both Aboriginal and Torres Strait Islander

6. What income do you receive?

- Full pension
- Part pension
- Paid employment
- Self-funded retiree

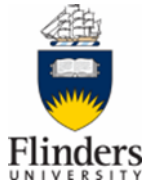

## Multidisciplinary Rehabilitation in Dementia: the Rehab-D Study

HREC Approval Number: HREC/16/SAC/434

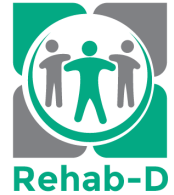

### Thank you!

That is the end of the questionnaire. Thank you very much for your answers. Please place the questionnaire in the enclosed envelope and put it into a postbox.

### ***What will happen to information about me?***

*The information you provide to us in the survey is anonymous. There is no information that could identify you. Your information will only be used for the purpose of this research project, and you have the right to request access to your survey responses after you send them back.*

*The data from this study will be owned by Flinders University. We will keep your anonymous survey for a period of at least 7 years, after which it will be destroyed. If you return your questionnaire and later decide that you don't want us to use it, you can contact us on the details below.*

*This research project has been approved by the Human Research Ethic Committee (HREC) of the SA Department for Health and Ageing. If you have any concerns or complaints, you can contact them on (08) 8226 7235 or email*

*[HealthHumanResearchEthicsCommittee@sa.gov.au](mailto:HealthHumanResearchEthicsCommittee@sa.gov.au).*
